# Supplementary material for: Membrane-interacting properties of the functionalised fatty acid moiety of muraymycin antibiotics
Source: Royal Society of Chemistry journal article supplement (doi:10.1039/c4md00526k), 2015-01-01
Supplement: c4md00526k1.pdf [file c4md00526k1.pdf]

## Supplementary Information

### Membrane-interacting properties of the functionalised fatty acid moiety of muraymycin antibiotics

Oliver Ries,<sup>a</sup> Christian Carnarius,<sup>a</sup> Claudia Steinem<sup>a</sup> and Christian Ducho<sup>\*a,b</sup>

<sup>a</sup> Georg-August-University Göttingen, Department of Chemistry, Institute of Organic and Biomolecular Chemistry, Tammannstr. 2, 37 077 Göttingen, Germany

<sup>b</sup> Saarland University, Department of Pharmacy, Pharmaceutical and Medicinal Chemistry, Campus C2 3, 66 123 Saarbrücken, Germany

Corresponding author \*E-mail: christian.ducho@uni-saarland.de

#### Table of contents

|                                                                              |    |
|------------------------------------------------------------------------------|----|
| <sup>1</sup> H and <sup>13</sup> C NMR spectra of synthesised compounds..... | S2 |
|------------------------------------------------------------------------------|----|

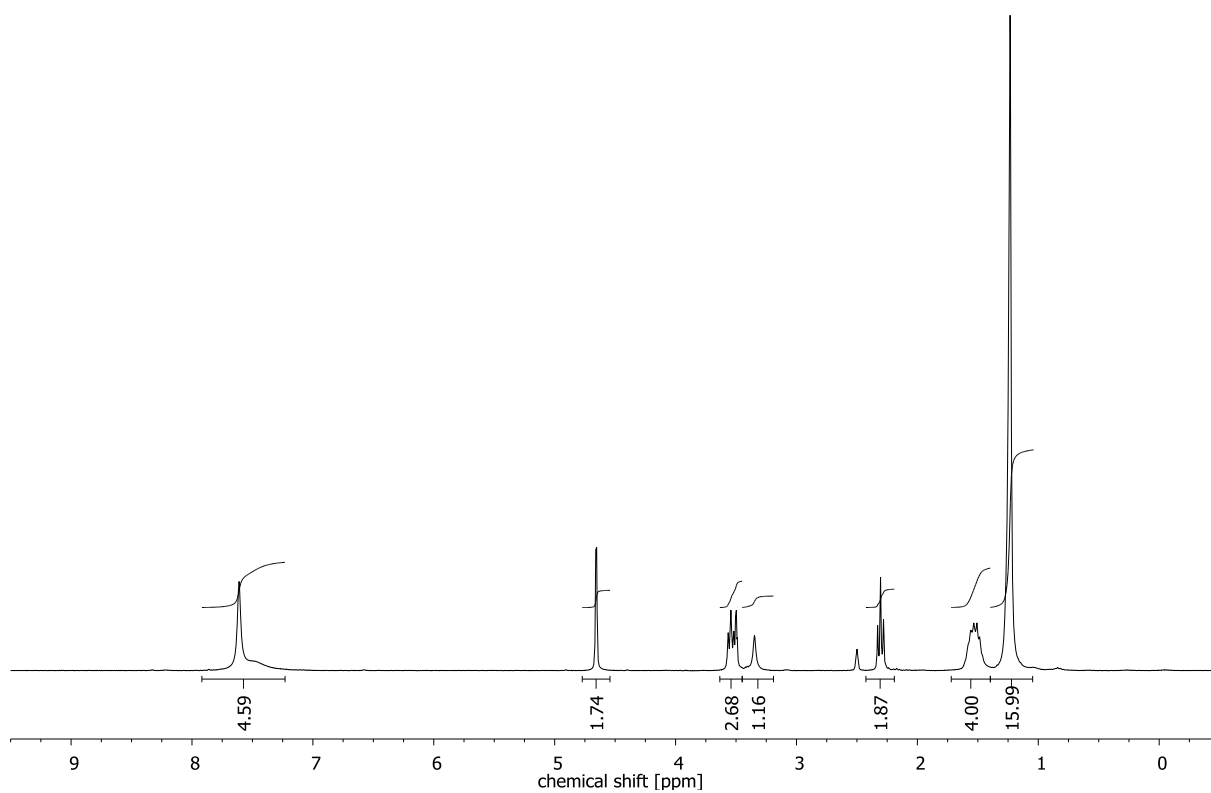

$^1\text{H}$  NMR spectrum of **10** (300 MHz,  $\text{DMSO-}d_6$ )

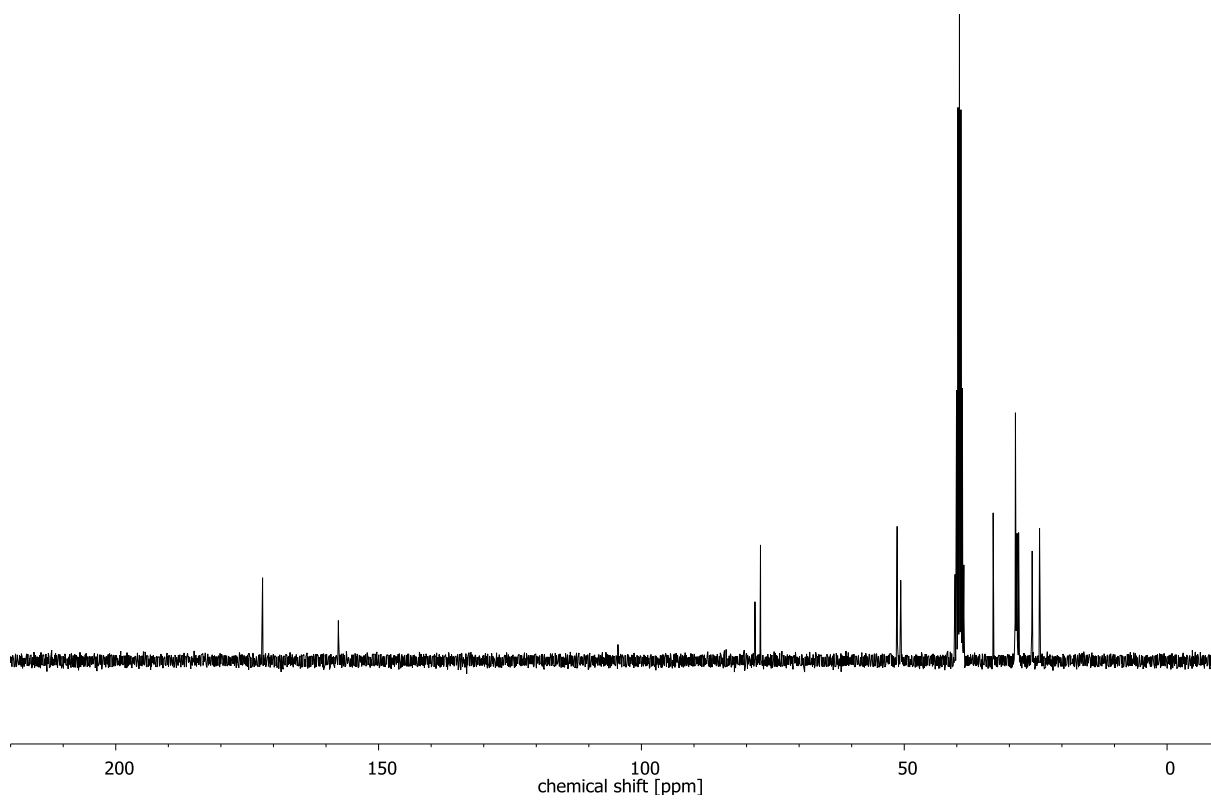

$^{13}\text{C}$  NMR spectrum of **10** (76 MHz,  $\text{DMSO-}d_6$ )

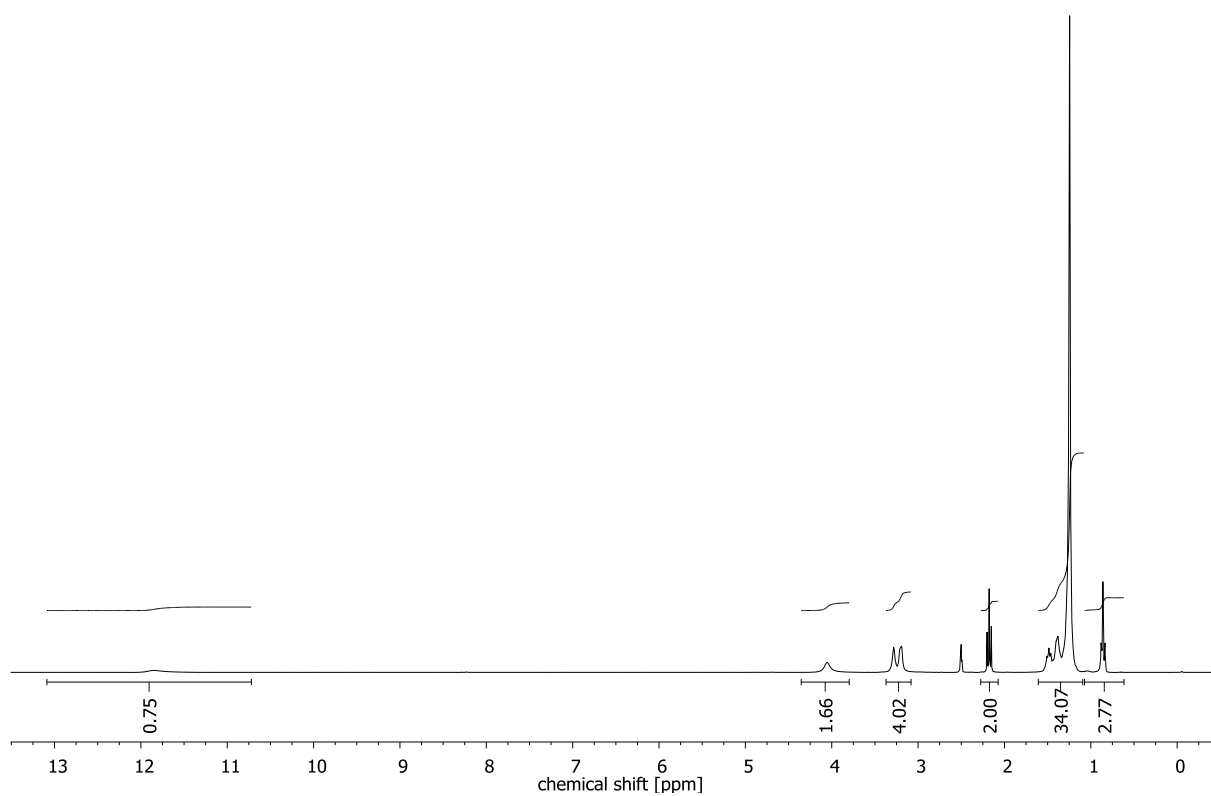

$^1\text{H}$  NMR spectrum of **14** (300 MHz,  $\text{DMSO-}d_6$ )

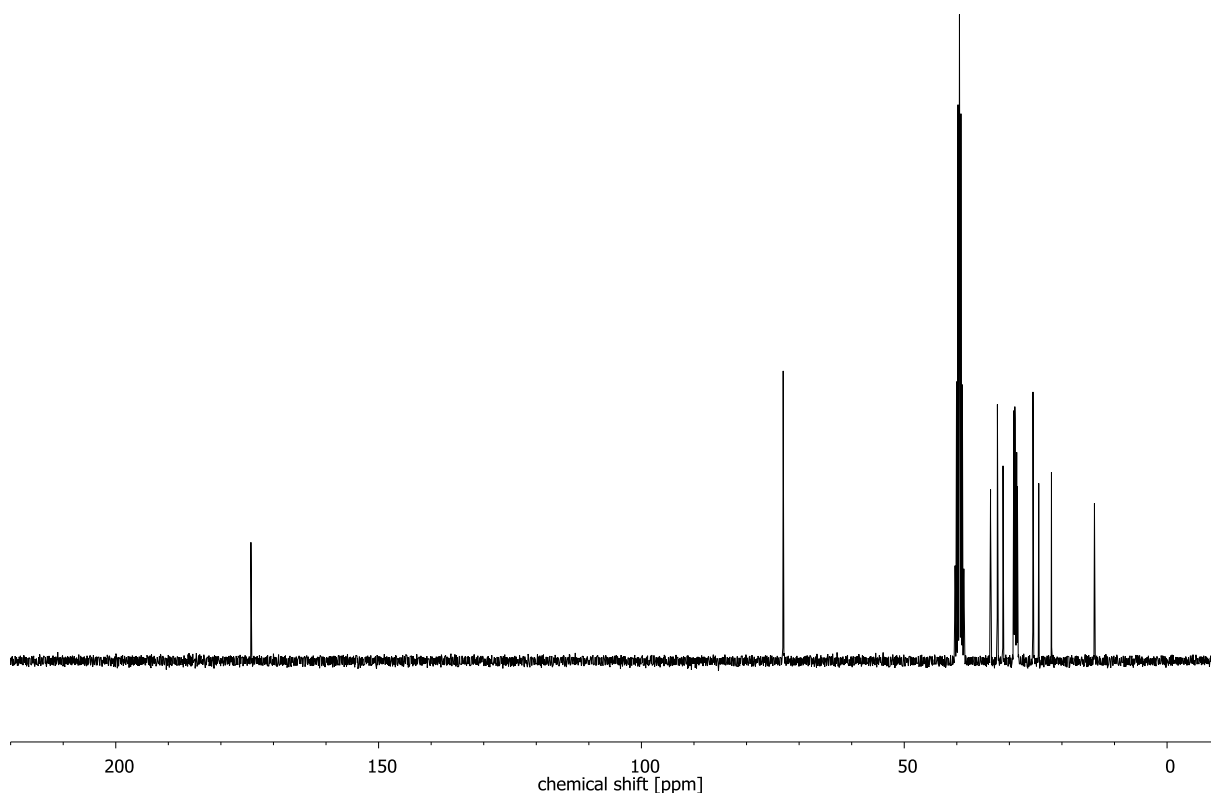

$^{13}\text{C}$  NMR spectrum of **14** (75 MHz,  $\text{DMSO-}d_6$ )

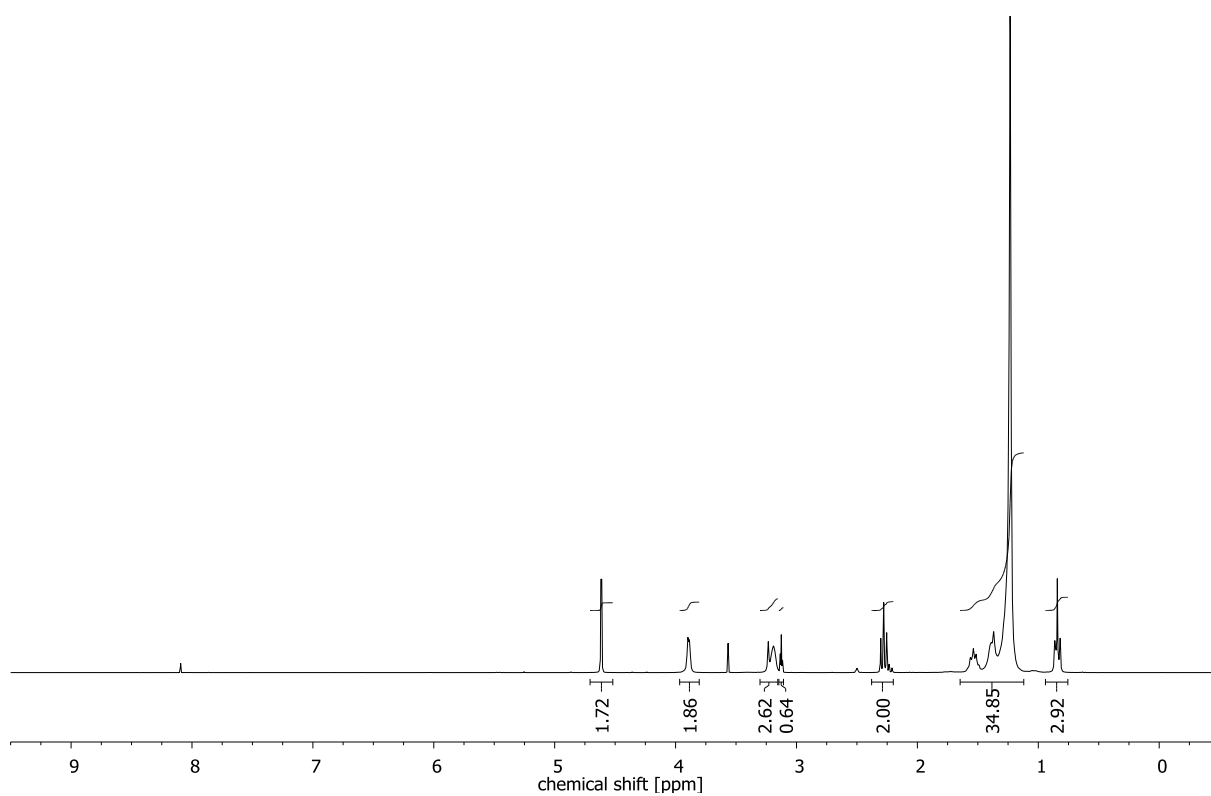

$^1\text{H}$  NMR spectrum of **15** (300 MHz,  $\text{DMSO-}d_6$ )

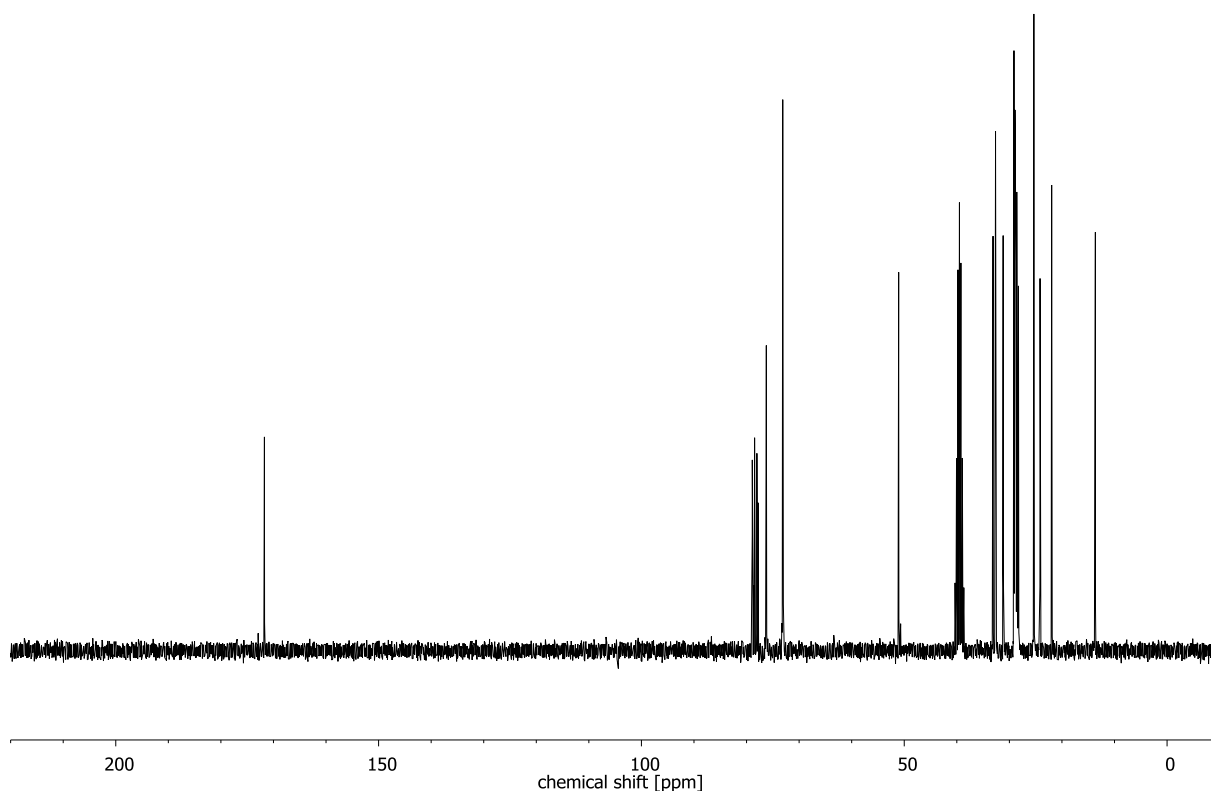

$^{13}\text{C}$  NMR spectrum of **15** (76 MHz,  $\text{DMSO-}d_6$ )

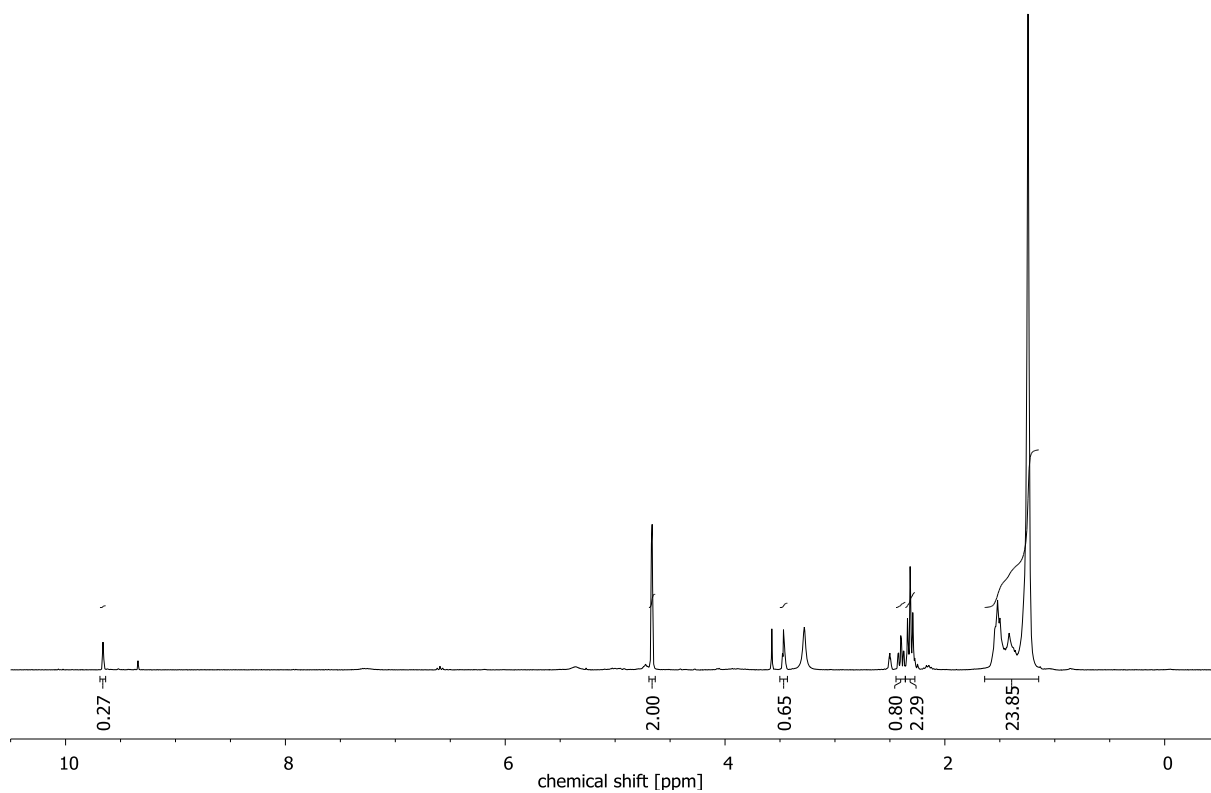

$^1\text{H}$  NMR spectrum of **16** (300 MHz,  $\text{DMSO-}d_6$ )

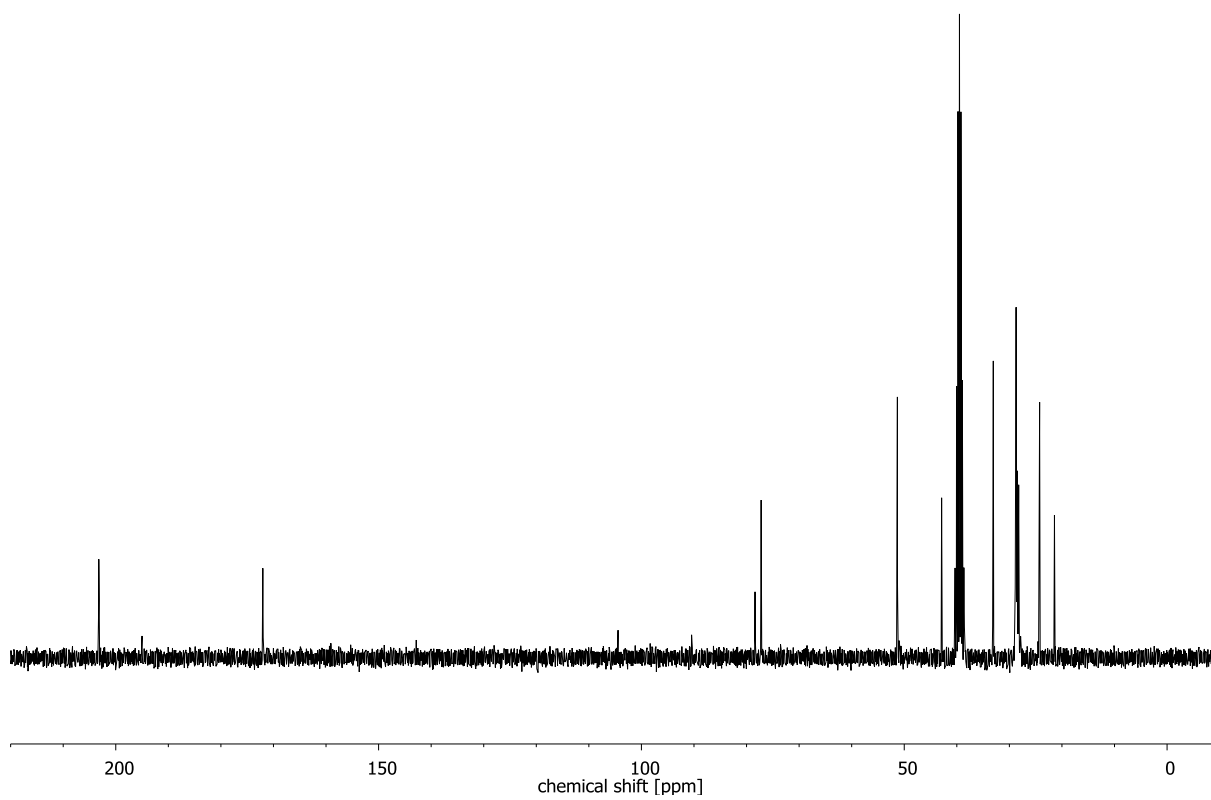

$^{13}\text{C}$  NMR spectrum of **16** (76 MHz,  $\text{DMSO-}d_6$ )

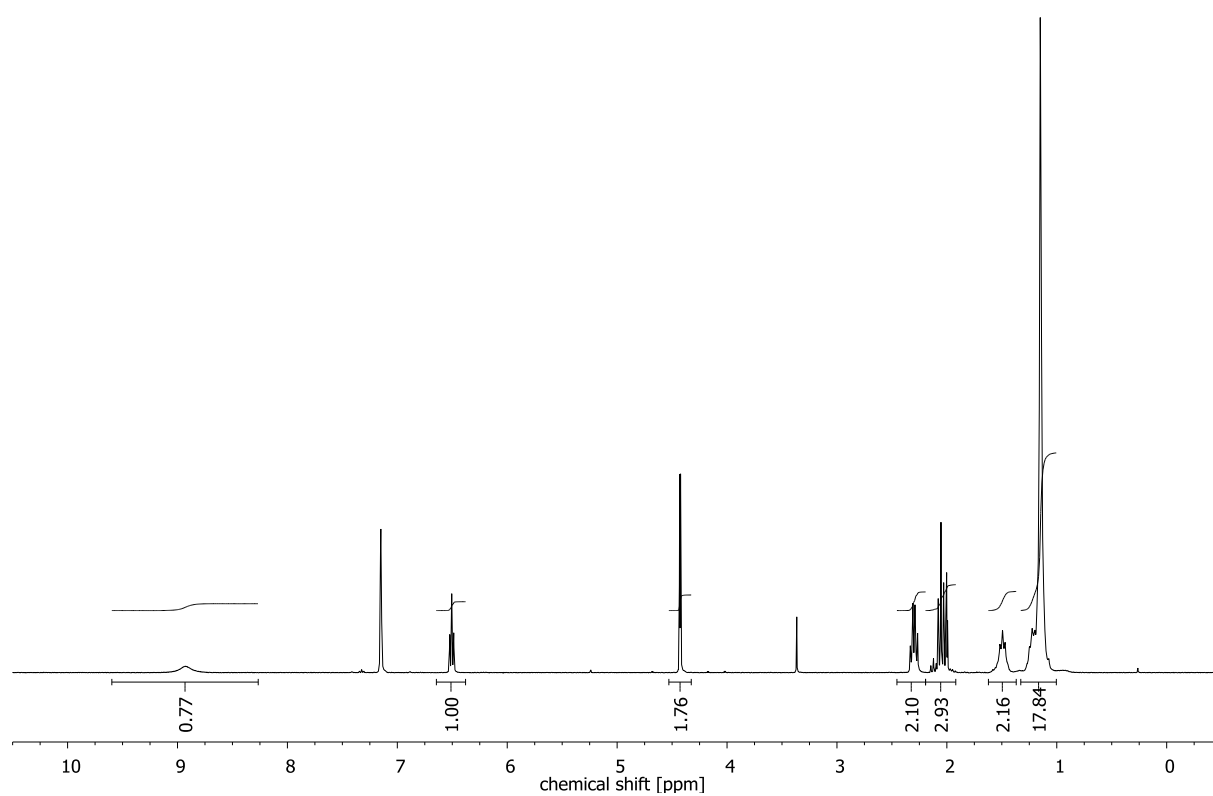

$^1\text{H}$  NMR spectrum of **17** (300 MHz,  $\text{C}_6\text{D}_6$ )

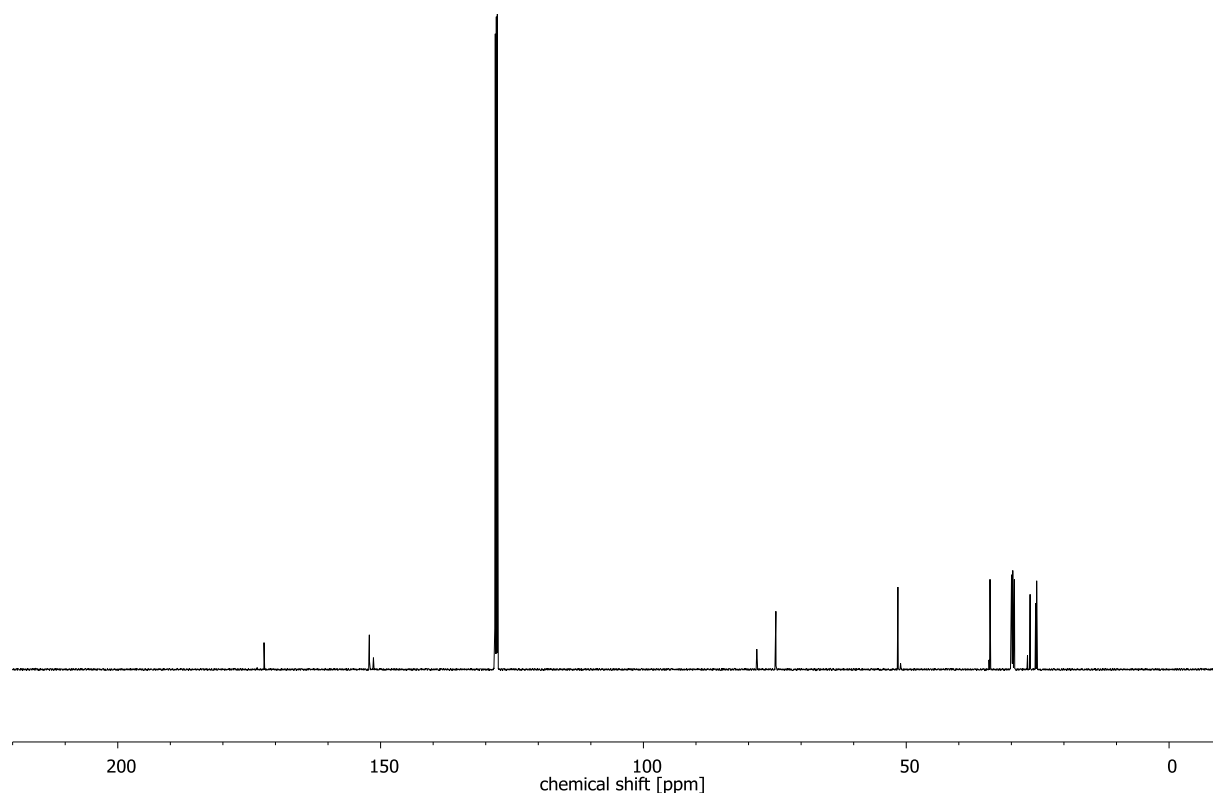

$^{13}\text{C}$  NMR spectrum of **17** (126 MHz,  $\text{C}_6\text{D}_6$ )

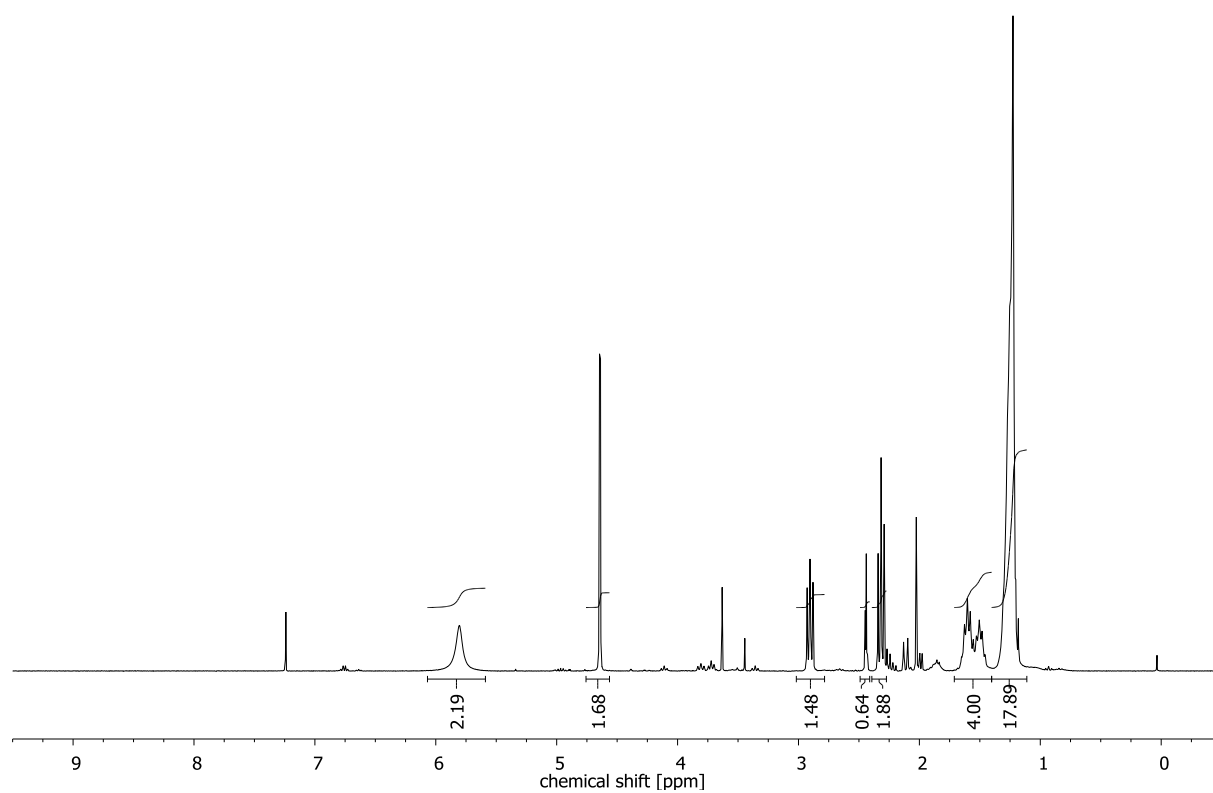

$^1\text{H}$  NMR spectrum of **18** (300 MHz,  $\text{CDCl}_3$ )

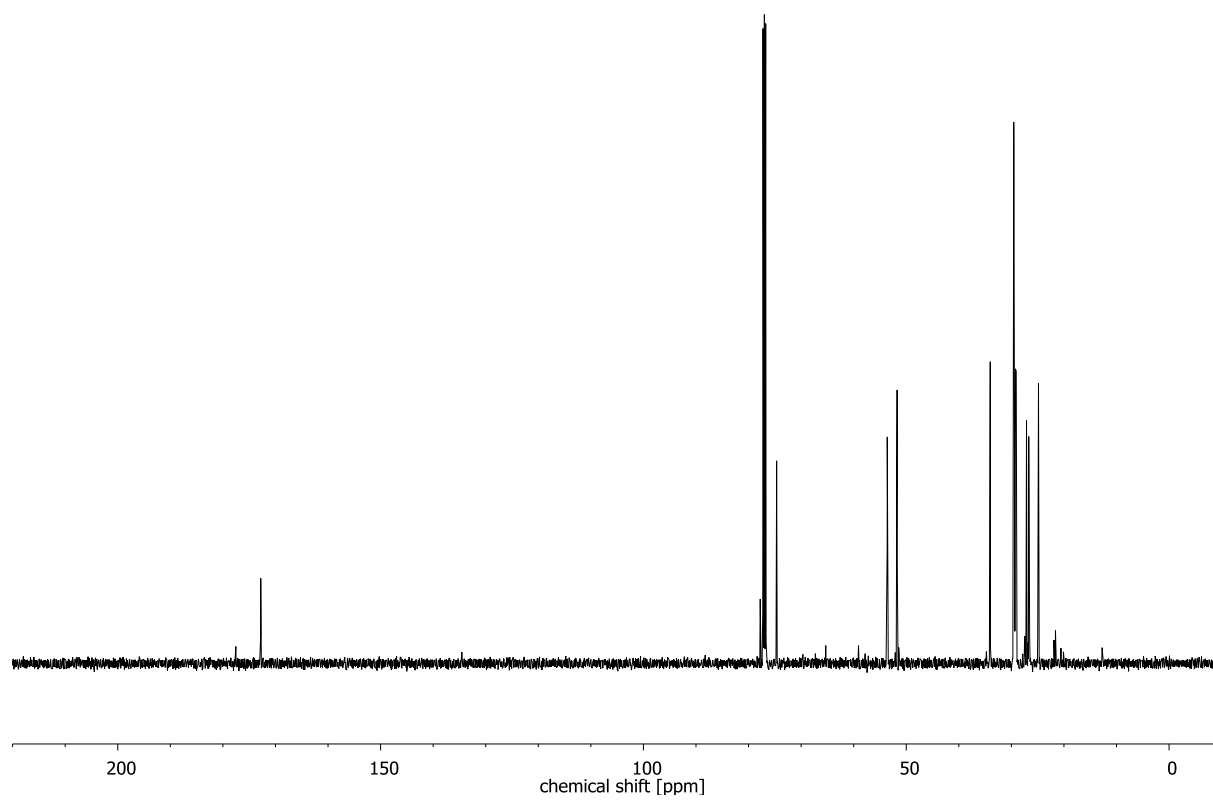

$^{13}\text{C}$  NMR spectrum of **18** (126 MHz,  $\text{CDCl}_3$ )
